# Supplementary material
Source: PubMed Central journal article supplement (PMC5829828)
Supplement: mbo001183760st1.pdf [file mbo001183760st1.pdf]

**Supplementary Table 1: *ilvB* and *hmpA* codon frequencies**

Frequency of each codon per 1000 codons in the *Salmonella* genome, *ilvB*, or *hmpA* genes. Orange denotes starvation resistant codons (1).

| AA-Codon | Genome | <i>ilvB</i> | <i>hmpA</i> |
|----------|--------|-------------|-------------|
| Ala-GCG  | 37     | 74.6        | 42.82       |
| Ala-GCA  | 16     | 12.43       | 12.59       |
| Ala-GCT  | 16     | 10.66       | 15.11       |
| Ala-GCC  | 25     | 24.87       | 42.82       |
| Cys-TGT  | 4      | 12.43       | 0           |
| Cys-TGC  | 6      | 1.78        | 5.04        |
| Asp-GAT  | 33     | 30.2        | 20.15       |
| Asp-GAC  | 22     | 19.54       | 27.71       |
| Glu-GAG  | 20     | 23.09       | 25.19       |
| Glu-GAA  | 43     | 24.87       | 47.86       |
| Phe-TTT  | 19     | 26.64       | 25.19       |
| Phe-TTC  | 17     | 3.55        | 27.71       |
| Gly-GGG  | 10     | 21.31       | 10.08       |
| Gly-GGA  | 6      | 8.88        | 2.52        |
| Gly-GGT  | 24     | 14.21       | 7.56        |
| Gly-GGC  | 33     | 37.3        | 52.9        |
| His-CAT  | 11     | 17.76       | 27.71       |
| His-CAC  | 10     | 7.1         | 15.11       |
| Ile-ATA  | 4      | 1.78        | 0           |
| Ile-ATT  | 27     | 44.4        | 17.63       |
| Ile-ATC  | 27     | 35.52       | 25.19       |
| Lys-AAG  | 12     | 8.88        | 12.59       |
| Lys-AAA  | 36     | 17.76       | 30.23       |
| Leu-TTG  | 12     | 15.99       | 2.52        |
| Leu-TTA  | 11     | 12.43       | 10.08       |
| Leu-CTG  | 55     | 53.29       | 57.93       |
| Leu-CTA  | 4      | 0           | 0           |
| Leu-CTT  | 10     | 1.78        | 7.56        |
| Leu-CTC  | 10     | 3.55        | 7.56        |
| Met-ATG  | 26     | 35.52       | 25.19       |
| Asn-AAT  | 17     | 19.54       | 15.11       |
| Asn-AAC  | 24     | 21.31       | 30.23       |
| Arg-AGG  | 1      | 0           | 0           |
| Arg-AGA  | 2      | 1.78        | 0           |
| Arg-CGG  | 5      | 5.33        | 2.52        |
| Arg-CGA  | 3      | 0           | 0           |
| Arg-CGT  | 23     | 17.76       | 25.19       |

|         |     |       |       |
|---------|-----|-------|-------|
| Arg-CGC | 23  | 17.76 | 15.11 |
| Ser-AGT | 7   | 15.99 | 0     |
| Ser-AGC | 16  | 8.88  | 27.71 |
| Ser-TCG | 8   | 8.88  | 2.52  |
| Ser-TCA | 6   | 1.78  | 7.56  |
| Ser-TCT | 9   | 5.33  | 0     |
| Ser-TCC | 10  | 5.33  | 2.52  |
| Thr-ACG | 15  | 12.43 | 15.11 |
| Thr-ACA | 6   | 12.43 | 10.08 |
| Thr-ACT | 9   | 5.33  | 5.04  |
| Thr-ACC | 25  | 23.09 | 25.19 |
| Val-GTG | 26  | 30.2  | 22.67 |
| Val-GTA | 12  | 5.33  | 15.11 |
| Val-GTT | 17  | 12.43 | 10.08 |
| Val-GTC | 16  | 8.88  | 17.63 |
| Trp-TGG | 12  | 7.1   | 15.11 |
| Tyr-TAT | 15  | 12.43 | 12.59 |
| Tyr-TAC | 12  | 3.55  | 17.63 |
| Pro-CCG | 15  | 44.4  | 35.26 |
| Pro-CCA | 7   | 0     | 5.04  |
| Pro-CCT | 7   | 12.43 | 0     |
| Pro-CCC | 5   | 14.21 | 12.59 |
| Gln-CAG | 31  | 49.73 | 35.26 |
| Gln-CAA | 13  | 12.43 | 10.08 |
| End-TGA | 0.8 | 0     | 0     |
| End-TAG | 0.2 | 0     | 0     |
| End-TAA | 2   | 1.78  | 2.52  |
