# Supplementary material
Source: PubMed Central journal article supplement (PMC5829828)
Supplement: mbo001183760st2.pdf [file mbo001183760st2.pdf]

Supplementary Table 2: Primers

| Purpose     | Genes                | Sequence (5' to 3')                                                                                                                               |
|-------------|----------------------|---------------------------------------------------------------------------------------------------------------------------------------------------|
| Deletion    | <i>relA</i>          | F:<br>TTACCGACTTCGGTAGGCCTGGTCCCTTAAGGAGAGGACGTA<br>TGAATATCCTCCTTAGTT<br>R:<br>GAACGAGTAGCAAAGCCGCTACATGATTACTGTCTGGGGTGT<br>GTAGGCTGGAGCTGCTTC  |
|             | <i>gppA</i>          | F:<br>GTACGCAGCCAACACGGATACAGGTTGAAGGATGAAGTGTTA<br>TGAATATCCTCCTTAGTT<br>R:<br>GGCCGATAAGCGAAGCGTCATCCGGCAATCAAACACTACGGGT<br>GTAGGCTGGAGCTGCTTC |
|             | <i>ilvD</i>          | F:<br>GCGTGAAGTATGAAGGGAAAAGATGGGGAGTAAATAAAGCTA<br>TGAATATCCTCCTTAGTT<br>R:<br>CCTTCCGGCGCGACTGACAGAGGTTGAGATTCCGCCATCAGT<br>GTAGGCTGGAGCTGCTTC  |
|             | <i>livKHM<br/>GF</i> | F:<br>AAAACAAAACATATAACATCACGAATGGGGATACAGGCACTAT<br>GAATATCCTCCTTAGTT<br>R:<br>GTTACCGGGGGCGGCGCACGCGCTTCCCCCTGGCACAGTG<br>TGTAGGCTGGAGCTGCTTC   |
|             | <i>brnQ</i>          | F:<br>TAATGTTTACAACATCACCATCCACAGGCAGTAAGACTTTGTG<br>TAGGCTGGAGCTGCTTC<br>R:<br>GGGGCGTTAAGCCCCGTGGTGTACACATATGTCAGCGATTAT<br>TCCGGGGATCCGTGCACC  |
| Epitope Tag | <i>ilvB</i>          | F:<br>GGTGCCGCCGGGCGCGGCAAATACAGAGATGGTGGGGGAAG<br>ACTACAAAGACCATGACGG<br>R:<br>GCTCCAGAATAACGTTATCATGTGATTGTTTCTGCATGGCCAT<br>ATGAATATCCTCCTTAG  |
|             | <i>ilvC</i>          | F:<br>CGGCTATATGACGGATATGAAGCGTATTGCGGTAGCGGGTGA<br>CTACAAAGACCATGACGG<br>R:<br>GTAGGTCAGGTAAGCGCTAGCGCCCCCGACAAGGTATACAT<br>ATGAATATCCTCCTTAG    |
|             | <i>ilvD</i>          | F:<br>CGATAAAGGCGCGGTGCGCGATAAATCGAAATTGGGAGGTGA<br>CTACAAAGACCATGACGG<br>R:<br>TGATGGCGGAATCTCAACCTCTGTCAGTCGCGCCGGAAGGCA<br>TATGAATATCCTCCTTAG  |
|             | <i>leuD</i>          | F:<br>GATTGCCGCCTACGAAAATAAACAACCGGCATTTATGCGGGA<br>CTACAAAGACCATGACGG                                                                            |

|                               |                   |                                                                                                                                                   |
|-------------------------------|-------------------|---------------------------------------------------------------------------------------------------------------------------------------------------|
|                               |                   | R: TGATATTGCATAACCTGTAGGCCCGGTAAGGCGTCAAGGGC<br>ATATGAATATCCTCCTTAG                                                                               |
| Cloning                       | <i>relA</i>       | F: TAGGGCCCAGACTTTATTTCAGGTTAATGAGGCGGTAAAC<br>R: TACTCGAGTTACCCCCGTGCAGTC                                                                        |
| Point Mutation                | <i>relA-D275G</i> | F: ACGGCGCGCACGCCAAAGAGTTCATCAAACG<br>R: CGTTTGATGAACTCTTTGGCGTGCGCGCCGT                                                                          |
|                               | <i>relA-E335Q</i> | F: CGGATCTGGATCTGAACGGTTTTACCGCCCCG<br>R: CGGGCGGTAAAACCGTTCAGATCCAGATCCG                                                                         |
| Complementation               | <i>relA</i>       | F: CTTACCGACTTCGGTAGGCCTGGTCCCTTAAGGAGAGGACG<br>ATGGTCGCGGTAAGAAGTGAC<br>R: TGCTGAACGAGTAGCAAAGCCGCTACATGATTACTGTCTGG<br>GGTGTGTTAGGCTGGAGCTGCTTC |
| qPCR                          | <i>ilvB</i>       | F: AGTTCGGGCACAACA<br>R: CCGGTGACGATACGAAT<br>Probe: 56-FAM/TCCGCGCCCGTAAAGC/38BHQ_1                                                              |
|                               | <i>ilvC</i>       | F: AGGCTGACCTGGTAGTTAACCTG<br>R: ACCACGGTGATGTCTTTACGGA<br>Probe: 56-FAM/CTGCTCGCCCACTTCCACGAT/38BHQ_1                                            |
|                               | <i>ilvD</i>       | F: CGCCAAGTACCCAGAAATACCA<br>R: TTCGTCCTGCGTAACCGTGA<br>Probe: 56-FAM/CCGCAAACGCTGGAACAGTACGAC/38BHQ_1                                            |
|                               | <i>leuA</i>       | F: ATCATGACGCCAGAGTCCATC<br>R: CGCTTCCAGGTCATAGTCGAAC<br>Probe: 56-FAM/TCGTACAGGTGGTCCATGTTGTAGTCT/38BHQ_1                                        |
|                               | <i>hmpA</i>       | F: CCAGCTTTGAGTTTGAACCAGTCG<br>R: TTCACGGCAATACGGTACCCT<br>Probe: 56-FAM/CAGGAGATCCGCCAATATTCAGTACCC/38BHQ_1                                      |
| <i>in vitro</i> Transcription | <i>ivbL</i>       | F: CATTACGCTGTAAGAACCTCGCTT<br>R: AGCCGACGTTCCGGGAAGG                                                                                             |
|                               | <i>ilvD</i>       | F: TGAATCGCTGTATCTGGCCG<br>R: GCCATATTACGACCATGAGTGGTG                                                                                            |
