# Supplementary material
Source: PubMed Central journal article supplement (PMC5829828)

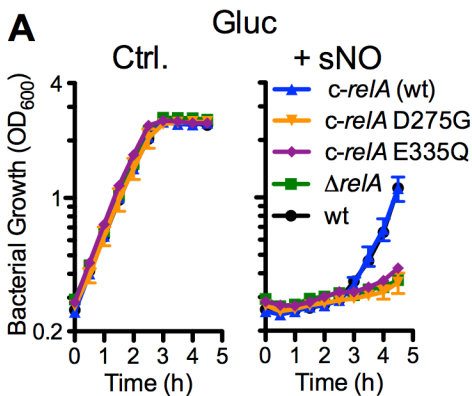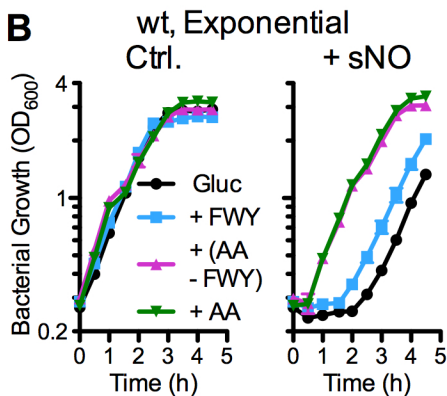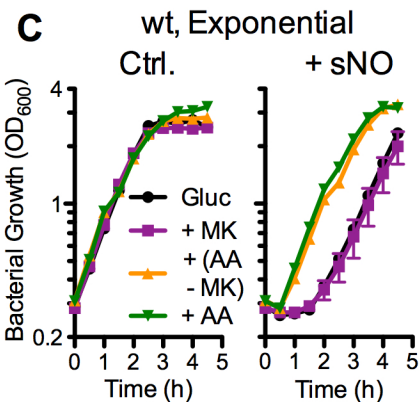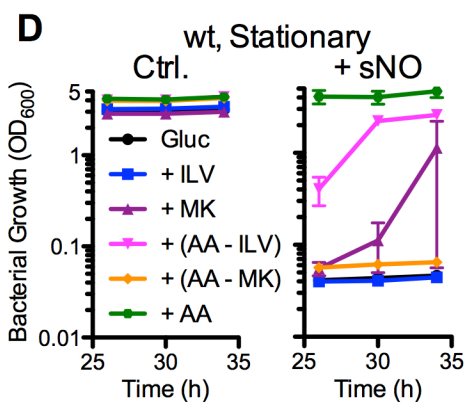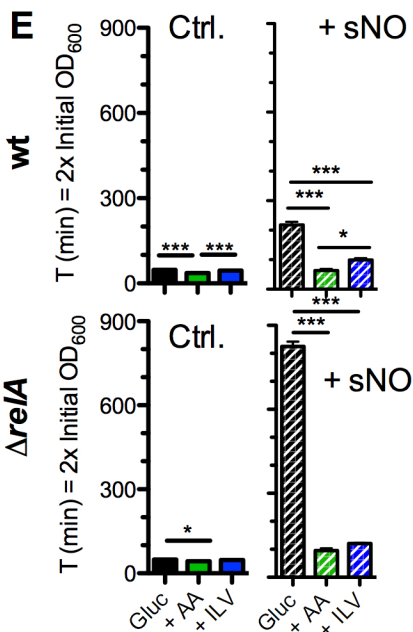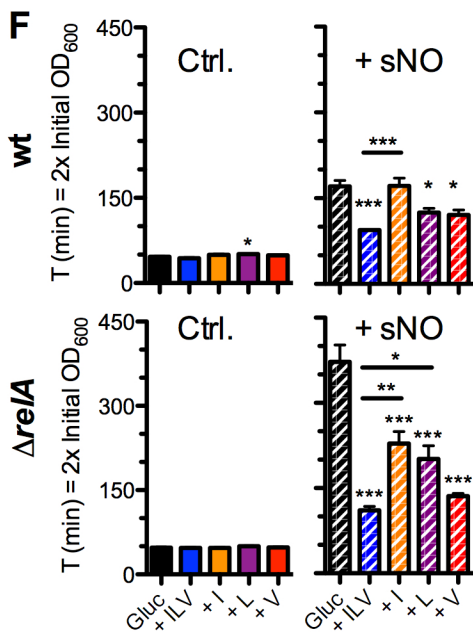

Supplement: mbo001183760sf2.pdf [file mbo001183760sf2.pdf]

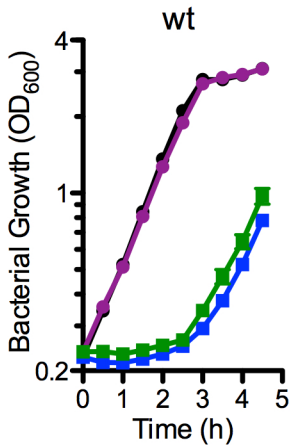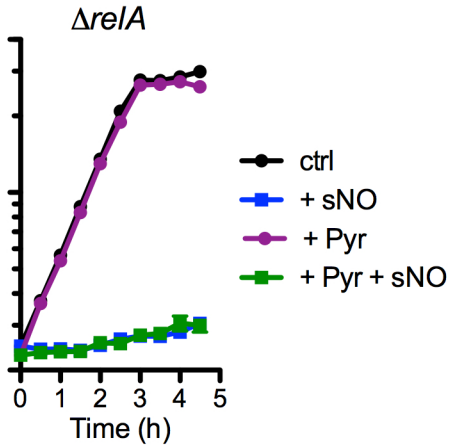

Supplement: mbo001183760sf5.pdf [file mbo001183760sf5.pdf]
